RESEARCH ARTICLE

# Sinapic Acid Prevents Hypertension and Cardiovascular Remodeling in Pharmacological Model of Nitric Oxide Inhibited Rats

Thangarasu Silambarasan<sup>1</sup>, Jeganathan Manivannan<sup>1,2</sup>, Mani Krishna Priya<sup>2</sup>, Natarajan Suganya<sup>2</sup>, Suvro Chatterjee<sup>2,3</sup>, Boobalan Raja<sup>1\*</sup>

1. Cardiovascular Biology Lab, Department of Biochemistry and Biotechnology, Faculty of Science, Annamalai University, Tamil Nadu, India, 2. Vascular Biology Lab, AU-KBC Research Centre, Anna University, Chennai, Tamil Nadu, India, 3. Department of Biotechnology, Anna University, Chennai, Tamil Nadu, India

\*[drjaau@gmail.com](mailto:drjaau@gmail.com)

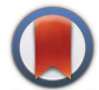

CrossMark  
click for updates

 OPEN ACCESS

**Citation:** Silambarasan T, Manivannan J, Krishna Priya M, Suganya N, Chatterjee S, et al. (2014) Sinapic Acid Prevents Hypertension and Cardiovascular Remodeling in Pharmacological Model of Nitric Oxide Inhibited Rats. PLoS ONE 9(12): e115682. doi:10.1371/journal.pone.0115682

**Editor:** Sudhiranjan Gupta, Texas A& M University Health Science Center, United States of America

**Received:** June 20, 2014

**Accepted:** December 1, 2014

**Published:** December 22, 2014

**Copyright:** © 2014 Silambarasan et al. This is an open-access article distributed under the terms of the [Creative Commons Attribution License](https://creativecommons.org/licenses/by/4.0/), which permits unrestricted use, distribution, and reproduction in any medium, provided the original author and source are credited.

**Data Availability:** The authors confirm that all data underlying the findings are fully available without restriction. All relevant data are within the paper.

**Funding:** The authors have no support or funding to report.

**Competing Interests:** The authors have declared that no competing interests exist.

## Abstract

**Objectives:** Hypertensive heart disease is a constellation of abnormalities that includes cardiac fibrosis in response to elevated blood pressure, systolic and diastolic dysfunction. The present study was undertaken to examine the effect of sinapic acid on high blood pressure and cardiovascular remodeling.

**Methods:** An experimental hypertensive animal model was induced by L-NAME intake on rats. Sinapic acid (SA) was orally administered at a dose of 10, 20 and 40 mg/kg body weight (b.w.). Blood pressure was measured by tail cuff plethysmography system. Cardiac and vascular function was evaluated by Langendorff isolated heart system and organ bath studies, respectively. Fibrotic remodeling of heart and aorta was assessed by histopathologic analyses. Oxidative stress was measured by biochemical assays. mRNA and protein expressions were assessed by RT-qPCR and western blot, respectively. In order to confirm the protective role of SA on endothelial cells through its antioxidant property, we have utilized the *in vitro* model of H<sub>2</sub>O<sub>2</sub>-induced oxidative stress in EA.hy926 endothelial cells.

**Results:** Rats with hypertension showed elevated blood pressure, declined myocardial performance associated with myocardial hypertrophy and fibrosis, diminished vascular response, nitric oxide (NO) metabolites level, elevated markers of oxidative stress (TBARS, LOOH), ACE activity, depleted antioxidant system (SOD, CAT, GPx, reduced GSH), aberrant expression of TGF-β, β-MHC, eNOS mRNAs and eNOS protein. Remarkably, SA attenuated high blood pressure, myocardial, vascular dysfunction, cardiac fibrosis, oxidative stress and ACE activity. Level of NO metabolites, antioxidant system, and altered gene expression

were also repaired by SA treatment. Results of *in vitro* study showed that, SA protects endothelial cells from oxidative stress and enhance the production of NO in a concentration dependent manner.

**Conclusions:** Taken together, these results suggest that SA may have beneficial role in the treatment of hypertensive heart disease by attenuating fibrosis and oxidative stress through its antioxidant potential.

---

## Introduction

High blood pressure or hypertension is the leading preventable risk factor for cardiovascular diseases and is estimated to account for about 54% of deaths from stroke and 47% of deaths from coronary heart disease in adults worldwide [1]. Myocardial remodeling has an important role in the pathophysiology of hypertensive disease [2]. Arterial hypertension, which modifies the structural and functional features of the myocardium and the blood vessels, a process known as cardiovascular (CV) remodeling. Cardiac remodeling involves molecular, cellular, and interstitial changes that manifest clinically as changes in size, shape, and function of the heart after injury or stress stimulation [3]. Vascular remodeling comprise of structural changes of the arterial walls, such as increased intima-media thickness, arterial stiffening, and deteriorating endothelial function [4].

Cardiac hypertrophy is a common type of cardiac remodeling that occurs when the heart experiences elevated workload. Pathological cardiac hypertrophy involves cellular and molecular remodeling such as myocyte growth without significant proliferation and alterations in the expression of proteins involved in excitation-contraction coupling [5]. Myocardial fibrosis is a common pathological feature seen in many patients with hypertension and is hypothesized to be the final common pathway that ultimately results in irreversible heart failure [6].

Oxidative stress occurs when there is an imbalance between the generation of reactive oxygen species (ROS) and the antioxidant defense systems so that the latter become overwhelmed [7,8]. ROS stimulates myocardial growth, matrix remodeling, and cellular dysfunction. It also activates a broad variety of hypertrophy signaling kinases and transcription factors [9]. ROS are produced by all vascular cell types, including endothelial, smooth muscle, and adventitial cells, and can be formed by numerous enzymes [10]. Physiologically, NADPH oxidase-derived ROS have been implicated in the regulation of vascular tone by modulating vasodilation directly or indirectly by decreasing nitric oxide bioavailability through quenching by  $O_2^{\cdot -}$  to form  $ONOO^-$  [11].

Nitric oxide (NO) helps to maintain vascular tone, inhibits endothelial cell stimulation, and is a regulator of platelet activation [12,13]. Chronic inhibition of NO produces volume-dependent elevation of blood pressure [14]. Bioavailability of NO can be maintained by inhibition of oxidative stress, and therefore the agents with antioxidant properties inactivating free radicals increase NO

bioavailability and can improve regulation of vascular tone [15]. In recent years, much attention has been focused on the protective properties of exogenous antioxidants in biological systems, and on the mechanisms of their action. Sinapic acid (SA), a phenolic acid is a cinnamic acid derivative, which possesses 3,5-dimethoxyl and 4-hydroxyl substitutions in the phenyl group of cinnamic acid. It is widely distributed in the plant kingdom and is obtained from various sources such as rye, fruits and vegetables [16]. It has already been pharmacologically evaluated for its potent antioxidant [17, 18], antihyperglycemic [19] and peroxynitrite scavenging effects [20]. In the light of its positive effects, we hypothesized that SA could also have beneficial effects in hypertension. Therefore, the aim of the present study was to investigate the effect of SA on high blood pressure and cardiovascular remodeling in pharmacological model of nitric oxide inhibited rats.

## Materials and Methods

### Animals and chemicals

Male albino Wistar rats, 8-10 weeks old weighing 180–220 g were obtained from the Central Animal House, Annamalai University, India. The animals housed three to a polypropylene cage were provided with standard pellet diet (Kamadhenu Agencies, Bengaluru, India) and water *ad libitum* and maintained under controlled conditions of temperature and humidity with an alternating light/dark cycle in accordance with the guidelines of the Committee for the Purpose of Control and Supervision of Experiments on Animals, New Delhi, India and approved by the Animal Ethical Committee of Annamalai University (approval no: 926).

N $\omega$ -Nitro-L-arginine methyl ester hydrochloride (L-NAME) and sinapic acid (SA) were purchased from Sigma-Aldrich (St. Louis, Missouri, USA). All other chemicals used in this study were of analytical grade obtained from Merck and Himedia, India.

### L-NAME hypertensive animal model and sinapic acid treatment

Animals were given L-NAME in drinking water at a dosage of 40 mg/kg body weight (b.w.) for 4 weeks [21]. SA was dissolved in corn oil (vehicle – 5 mL/kg) and administered orally everyday using an intragastric tube for a period of 4 weeks.

Each of the following groups consisted of six animals. Group I: Control; Group II: Rats were treated with SA (40 mg/kg b.w.); Group III: Rats were given L-NAME (40 mg/kg b.w.); Group IV: Rats were simultaneously treated with L-NAME (40 mg/kg b.w.) and SA (10 mg/kg b.w.); Group V: Rats were simultaneously treated with L-NAME (40 mg/kg b.w.) and SA (20 mg/kg b.w.); Group VI: Rats were simultaneously treated with L-NAME (40 mg/kg b.w.) and SA (40 mg/kg b.w.). Vehicle was administered alone to control (Group I) and L-

NAME control rats (Group III) orally using an intragastric tube daily for 4 weeks. Body weight was measured daily for all rats.

### Blood pressure measurement

Before commencement of the experiment, animals were trained with instrument for measuring blood pressure. In all groups of animals, systolic blood pressure (SBP) was measured every week during the entire period of the study noninvasively using a tail cuff method (IITC, model 31, USA). Values reported are the average of three sequential blood pressure measurements.

### Heart weight and collagen content

The heart was dissected out and then weighed. Heart weight-to-body weight ratio was calculated. As an estimate of collagen content, hydroxyproline concentration was determined in left ventricular samples as described previously [22]. Hydroxyproline concentration was determined from standard curve and expressed as mg/g dry weight.

### Histopathology of heart and aorta

Excised heart and aorta samples were cleared of blood and immediately fixed in 10% formalin. 5  $\mu$ m thick tissue sections from heart and aorta were prepared from processed paraffin-embedded samples. For the histological examination of the collagen accumulation, masson's trichrome and picosirius red staining were used. Heart sections were stained with picosirius red and masson's trichrome stains, aortic sections were stained with masson's trichrome and examined under a light microscope for evidence of fibrotic changes in tissues.

### Antioxidants and lipid peroxidation

Heart and aortic tissues were sliced into pieces and homogenized in 0.1 M Tris-HCl buffer in cold condition (pH 7.4) to give 20% homogenate (w/v). The homogenate was centrifuged at  $560 \times g$  for 10 min at 4°C. The supernatant was separated and used for various biochemical estimations.

Superoxide dismutase (SOD) activity was assayed in the tissues (heart and aorta) by the method of Kakkar et al. [23]. The assay mixture contained 1.2 mL of sodium pyrophosphate buffer, 0.1 mL of phenazine methosulphate, and 0.3 mL of nitroblue tetrazolium and appropriately diluted enzyme preparation in a total volume of 3 mL. The reaction was started by the addition of 0.2 mL of nicotinamide adenine dinucleotide (NADH). After incubation at 30°C for 90 s, the reaction was arrested by the addition of 1.0 mL of glacial acetic acid. The reaction mixture was stirred vigorously and shaken with 4.0 mL of n-butanol. The mixture was allowed to stand for 10 min; centrifuged and n-butanol layer was separated. The color density of the chromogen in n-butanol was measured at 510 nm against butanol blank.

The activity of catalase in the tissues was assayed by the method of Sinha [24]. To 0.9 mL of phosphate buffer, 0.1 mL of tissue homogenate and 0.4 mL of H<sub>2</sub>O<sub>2</sub> were added. The reaction was arrested after 60 s by adding 2.0 mL of dichromate–acetic acid mixture. The tubes were kept in a boiling water bath for 10 min and the color developed was read at 620 nm.

The activity of glutathione peroxidase (GPx) in the tissues was measured by the method of Rotruck et al. [25]. To 0.2 mL of Tris buffer, 0.2 mL of ethylene diamine tetraacetic acid (EDTA), 0.1 mL of sodium azide, and 0.5 mL of tissue homogenate were added. To the mixture, 0.2 mL of glutathione followed by 0.1 mL of H<sub>2</sub>O<sub>2</sub> was added. The contents were mixed well and incubated at 37°C for 10 min along with a tube containing all reagents except the sample. After 10 min, the reaction was arrested by the addition of 0.5 mL of 10% TCA. The tubes were centrifuged and the supernatant was used for the estimation of glutathione.

Reduced glutathione (GSH) in the tissues was estimated by the method of Ellman [26]. 0.5 mL of homogenate was pipetted out and precipitated with 2.0 mL of 5% TCA. A total of 2.0 mL of supernatant was taken after centrifugation and 1.0 mL of Ellman's reagent and 4.0 mL of 0.3 M disodium hydrogen phosphate were added. The yellow color developed was read at 412 nm. Total protein was assayed by the method of Lowry et al. [27].

The level of thiobarbituric acid reactive substances (TBARS) in tissues was estimated by the method of Niehaus and Samuelson [28]. A total of 0.5 mL of tissue homogenate was diluted with 0.5 mL of double distilled water and mixed well, and then 2.0 mL of thiobarbituric acid (TBA)–trichloroacetic acid (TCA)–hydrochloric acid (HCL) reagent was added. The mixture was kept in boiling water bath for 15 min. After cooling, the tubes were centrifuged for 10 min and the supernatant was taken for measurement. The absorbance was read at 535 nm against reagent blank.

Estimation of tissue lipid hydroperoxides (LOOH) was done by the method of Jiang et al. [29]. Fox reagent (0.9 mL) was mixed with 0.1 mL of tissue homogenate and incubated for 30 min at room temperature. The color developed was read at 560 nm.

### Aortic nitric oxide metabolites level

Nitric oxide (NO) easily breaks down with the presence of free radicals, hence aortic nitrite levels were measured as a level of NO inactivated due to superoxide radical (O<sub>2</sub><sup>-</sup>). Nitrite was estimated colorimetrically with the Griess reagent in aortic homogenate. Briefly equal volumes of aortic homogenate and Griess reagent (sulfanilamide 1% w/v, naphthylethylenediamine dihydrochloride 0.1% w/v, and orthophosphoric acid 2.5% v/v) were mixed and incubated at room temperature for 10 min and the absorbance was determined at 540 nm wavelength [30]. Nitrite was determined from the standard curve obtained using sodium nitrite as standard. The amount of nitrite formed was normalized to the protein content of the respective aorta.

### Estimation of ACE activity

The angiotensin-converting enzyme (ACE) activity in heart and aortic tissues was measured by the spectrophotometric assay as described previously [31]. ACE activity in tissue homogenate was measured by hydrolysis of Hip–His–Leu. Briefly, Hip–His–Leu was hydrolyzed into hippuric acid and His–Leu by ACE. Hippuric acid was extracted by ethyl acetate and determined at 228 nm. ACE activity was expressed as mU per mg protein.

### Langendorff isolated heart study

The left ventricular function of the rat heart was assessed using the Langendorff heart preparation. Briefly, after anesthesia, the heart was excised and placed in cooled (4°C) Krebs Henseleit bicarbonate solution [composition (in mM): 118 NaCl, 4.7 KCl, 1.2 MgSO<sub>4</sub>, 1.2 KH<sub>2</sub>PO<sub>4</sub>, 2.3 CaCl<sub>2</sub>, 25.0 NaHCO<sub>3</sub>, 11.0 glucose]. The heart was then attached to the cannula through aorta and retrogradely perfused with the Krebs solution maintained at 37°C and continuously gassed with a mixture of 95% O<sub>2</sub>–5% CO<sub>2</sub>. Perfusion pressure was kept constant at 80 mmHg. Isovolumetric recordings of rate of pressure development (+dp/dt) and rate of pressure decline (–dp/dt) were obtained from a balloon catheter inserted into the left ventricle. The ventricular balloon was connected via fluid-filled tubing to a pressure transducer (AD Instruments, Australia) for continuous assessment of ventricular performance as described previously [32].

### Isolated aortic ring experiment

The thoracic aorta was dissected out, cleaned of surrounding connective tissue and placed in freshly prepared ice-cold Modified Krebs–Henseleit solution (MKHS) of the following composition (mM): 118 NaCl, 4.7 KCl, 2.5 CaCl<sub>2</sub>, 1.2 MgSO<sub>4</sub>, 11.9 NaHCO<sub>3</sub>, 1.2 KH<sub>2</sub>PO<sub>4</sub> and 11.1 D-glucose (pH of 7.4). The arterial segments were mounted on two stainless steel hooks and suspended in 10 mL organ baths containing MKHS. Bathing solution was continuously aerated with 95% O<sub>2</sub>–5% CO<sub>2</sub> mixture and maintained at 37°C. An optimal baseline tone of 1.5 g was applied to all the rings. Relaxations in response to acetylcholine (Ach) and sodium nitroprusside (SNP) were examined in phenylephrine pre-contracted aortic rings. Tension was recorded using a high sensitivity isometric force transducer and stored in a computer using Chart version 6.1.3 software program (Powerlab, AD Instruments, Bella Vista, NSW, Australia) for further analysis. Differences between groups were assessed by ANOVA using Graph Pad Prism version 4 (San Diego, California, USA). Concentration response curves were analyzed using two-way ANOVA followed by Bonferroni tests to compare individual points. Significance was defined as  $P < 0.05$ . All the inducer concentrations were used as described previously [33].



### mRNA expression analysis

After the study period, the heart and aortic tissues were subjected to total RNA extraction using RNA isolation kit (BioUltra). The integrity, quality and quantity of RNA were determined by nano-drop spectrometer. 1  $\mu$ g of RNA was used for real time quantitative polymerase chain reaction (RT-qPCR) using SYBR green method. SYBR Green JumpStart Taq Ready Mix real time PCR kit (Sigma Aldrich, USA) was utilized as per manufacturer's instructions for reverse transcription and amplification. Primer sequences for forward primer (FP) and reverse primer (RP) were as follows; Transforming growth factor- $\beta$  (TGF- $\beta$ ) FP: 5'-ATGACAT-GAACCGACCCTTC-3' and RP: 5'-GTAGTTGGTATCCAGGGCTCTC-3';  $\beta$ -myosin heavy chain ( $\beta$ -MHC) FP: 5'-GTAGACAAGGGCAAAGGCAA-3' and RP: 5'-GGATGATGCAGCGTACAAAG-3'; Endothelial nitric oxide synthase (eNOS) FP: 5'-CTGGCAAGACCGATTACACGA-3' and RP: 5'-CGCAATGTGA-GTCCGAAAATG-3'; glyceraldehydes-3-phosphate dehydrogenase (GAPDH) FP: 5'-ACCACAGTCCATGCCATCAC-3' and RP: 5'-TCCACCACCCTGTT-GCTGTA-3'. The amplification specificity of all the primers was identified through resolving the PCR products by agarose gel electrophoresis. The relative fold change method was employed for calculating the differential expression between samples [34]. Fold change values were averaged from three reactions.

### Protein expression study

Tissue proteins were extracted by homogenization of aortas in Radio-Immunoprecipitation Assay (RIPA) buffer followed by centrifugation at 10,000  $\times$  g for 20 min. The supernatants were collected, and protein concentrations were estimated using the BCA protein assay kit (Merck, India). Protein samples were separated with 10% SDS-polyacrylamide gel electrophoresis gels and electrophoretically transferred onto polyvinylidene difluoride (PVDF) membranes (Merck Millipore, USA). Nonspecific binding sites were blocked by 1% BSA in PBS with 0.05% TWEEN 20 at room temperature for 1 hour, then incubated overnight at 4  $^{\circ}$ C with primary antibody against eNOS (1:1000 dilution) and then incubated with anti-mouse IgG (Sigma-Aldrich, USA) conjugated to horseradish peroxidase. The reaction was developed with a DAB detection system (Merck, India). The densitometric analysis was performed using ImageJ software (NIH, Bethesda, MD). Western Blot densitometry data of eNOS was normalized to  $\beta$ -actin.

### Endothelial cell culture and *in vitro* oxidative stress study

EA.hy926, an immortalized endothelial hybrid cell line was a kind gift from Dr. C.J.S. Edgell, Mayo Clinic, Rochester, MN, USA. The cells were maintained in DMEM medium containing 10% fetal bovine serum, 1% penicillin/streptomycin at 37 $^{\circ}$ C, 5% CO<sub>2</sub>. Cells that were between passages 4 and 10 were used in this study. All the assays were performed by seeding EA.hy926 cells in the concentration of 1  $\times$  10<sup>4</sup> cells/well in 96-well plate. In order to evaluate the

cytotoxic effect, EA.hy926 cells were treated with SA (25–100  $\mu\text{M}$ ) for 24 h and checked for its viability using MTT assay. For evaluation of protective potential of SA against oxidative stress,  $\text{H}_2\text{O}_2$ -induced *in vitro* oxidative stress model was developed as described previously [35]. In this study, different concentrations of SA (0.1, 1 and 10  $\mu\text{M}$ ) in DMEM medium were added to the wells and incubated for 24h, then the cells were exposed to 300  $\mu\text{M}$   $\text{H}_2\text{O}_2$  for further 4h. For viability analysis, MTT solution (1 mg/mL) was added to each well, and the plate was incubated for 4 h at 37°C. After incubation and formazan solubilisation, optical density (OD) of each well was measured on a microplate reader at 570 nm. The OD of formazan formed in untreated cells was taken as 100% viability. We have chosen 10  $\mu\text{M}$  dose of SA for the evaluation of total ROS and NO level. The level of intracellular ROS formation was quantified using redox-sensitive fluorescent probe 2, 7-dichlorodihydrofluorescein diacetate (DCFH-DA). NO level was measured using 0.1  $\mu\text{M}$  of diaminorhodamine-4M (DAR-4M AM) dye and the images were acquired using Olympus IX71 inverted fluorescence microscope as described previously [36]. The fluorescence intensity of the DCF and DAR images was calculated using Adobe Photoshop version 7.0.

### Statistical analysis

Data were analyzed by one-way analysis of variance (ANOVA) followed by Duncan's multiple range test (DMRT) using statistical package for the social science (SPSS) software version 14.0. For aortic relaxation, data were analyzed by two-way ANOVA followed by Bonferroni post hoc test. Values were considered significant when  $P < 0.05$ .

## Results

### Blood pressure and cardiovascular remodeling

[Fig. 1](#) shows the effect of sinapic acid (SA) at three different concentrations (10, 20 and 40 mg/kg) on systolic blood pressure. L-NAME treated rats showed significantly ( $P < 0.05$ ) increased systolic blood pressure when compared with control and this increase was attenuated by SA treatment. The dosage of 40 mg/kg showed better effect in the reduction of blood pressure compared with other two doses. Hence, 40 mg/kg dose was selected for further evaluation.

The heart weight-to-body weight ratio was significantly ( $P < 0.05$ ) increased in L-NAME rats and this increase was attenuated by SA treatment ([Fig. 2D](#)). L-NAME induced hypertension significantly ( $P < 0.05$ ) increased hydroxyproline level when compared with control and this increase was prevented by oral SA treatment ([Fig. 2E](#)).

The heart sections with masson's trichrome and picosirius red staining showed elevated accumulation of collagen and interstitial fibrosis in L-NAME heart whereas SA treatment markedly reduced all the above changes ([Fig. 2A and B](#), respectively). Aortic sections from L-NAME rats with masson's trichrome staining



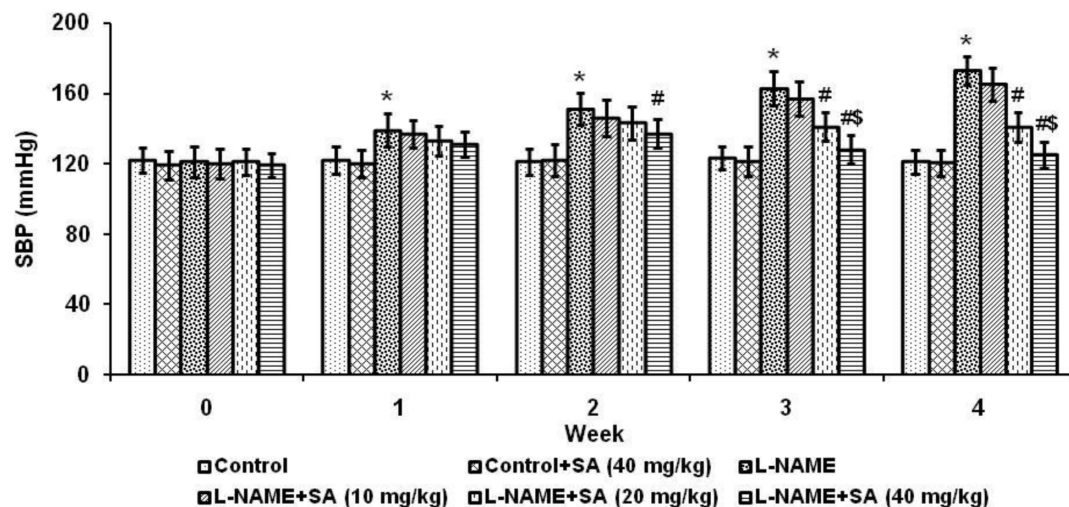

**Fig. 1. Sinapic acid attenuated increase in systolic blood pressure in experimental hypertensive rats.** Values are expressed as mean  $\pm$  SD.  $n=6$  per group. \*  $P<0.05$  vs control; #  $P<0.05$  vs L-NAME; \$  $P<0.05$  vs L-NAME+SA (20 mg/kg).

doi:10.1371/journal.pone.0115682.g001

showed marked vascular fibrosis and this change was prevented by administration of SA (Fig. 2C).

### Biochemical variables measured

The activities of enzymatic antioxidants such as SOD, CAT, GPx and the level of non-enzymatic antioxidant GSH, lipid peroxidation products such as TBARS, LOOH were presented in Table 1. L-NAME induction significantly ( $P<0.05$ ) reduced the activity of above enzymes, level of GSH and increased the formation of lipid peroxidation products. Treatment with SA significantly ( $P<0.05$ ) restored the activity of enzymatic antioxidants, level of GSH and reduced the level of lipid peroxidation products. Aortic nitrite/nitrate level was significantly ( $P<0.05$ ) reduced in L-NAME rats whereas SA treatment for 4 weeks significantly ( $P<0.05$ ) restored the above (Fig. 3A). L-NAME hypertension significantly ( $P<0.05$ ) enhanced the activity of ACE in heart and aorta compared with control and this increase was attenuated by SA treatment (Fig. 3B).

### Cardiovascular function – Langendorff and organ bath study

The systolic contractility of the isolated heart was measured by the first temporal derivative of the left ventricular pressure (LVP) positive development (+dP/dt, in mmHg/s), and the isovolumetric relaxation was measured by the first temporal derivative of the LVP negative pressure (−dP/dt, in mmHg/s). In the heart of L-NAME rats, the rate of LV pressure rise (+dP/dt, in mmHg/s) and the rate of LV pressure decline (−dP/dt, in mmHg/s) was significantly ( $P<0.05$ ) reduced. SA treatment significantly ( $P<0.05$ ) promoted ventricular function in L-NAME rats (Fig. 4A). Sensitivity of the aortic rings to acetylcholine from rats given L-NAME

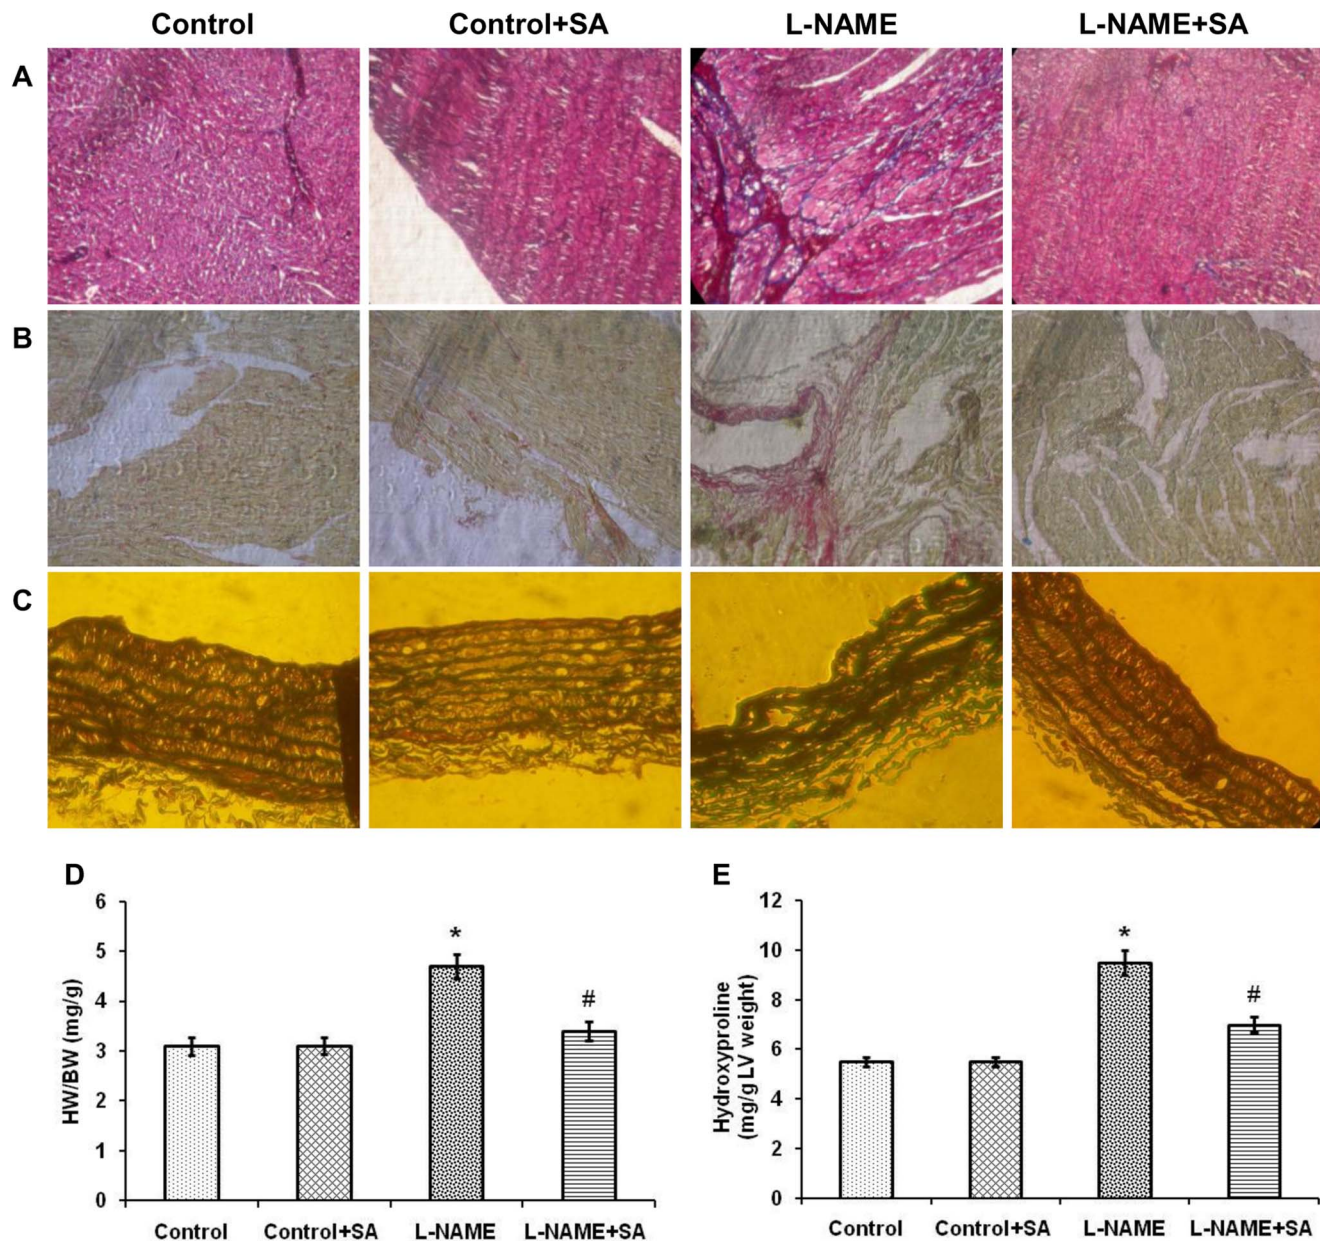

**Fig. 2. Sinapic acid inhibited cardiovascular remodeling in experimental hypertensive rats.** (A) Representative pictures of myocardial tissue sections stained with masson's trichrome. (B) Representative pictures of myocardial tissue sections stained with picrosirius red. (C) Representative pictures of aortic tissue sections stained with masson's trichrome. In all the above three panels (A, B & C) tissue sections from L-NAME group showed fibrosis and this was attenuated in L-NAME+SA group. (D) Estimation of heart weight-to-body weight ratio in various experimental groups. (E) Quantification of hydroxyproline level in various experimental groups. Values are expressed as mean  $\pm$  SD. n=6 per group. \*  $P < 0.05$  vs control; #  $P < 0.05$  vs L-NAME.

doi:10.1371/journal.pone.0115682.g002

was significantly ( $P < 0.05$ ) reduced. When aortic tissues from rats given SA were challenged with acetylcholine, the vasodilatation was almost restored (Fig. 4B). Exposure of the aortic rings to cumulative concentrations of nitrovasodilator, sodium nitroprusside produced dose-response curves that were almost

**Table 1.** Sinapic acid prevented oxidative stress.

| Parameter                        | Sample | Control      | Control+SA   | L-NAME                     | L-NAME+SA                 |
|----------------------------------|--------|--------------|--------------|----------------------------|---------------------------|
| SOD (U <sup>*</sup> /mg protein) | Heart  | 7.11 ± 0.36  | 7.02 ± 0.31  | 3.67 ± 0.29 <sup>*</sup>   | 5.42 ± 0.41 <sup>#</sup>  |
|                                  | Aorta  | 12.33 ± 0.82 | 12.79 ± 0.78 | 7.61 ± 0.43 <sup>*</sup>   | 10.18 ± 0.72 <sup>#</sup> |
| CAT (U <sup>#</sup> /mg protein) | Heart  | 49.23 ± 3.56 | 50.11 ± 2.85 | 32.28 ± 2.86 <sup>*</sup>  | 43.18 ± 3.41 <sup>#</sup> |
|                                  | Aorta  | 55.6 ± 3.24  | 56.21 ± 2.73 | 35.44 ± 2.67 <sup>*</sup>  | 47.22 ± 3.55 <sup>#</sup> |
| GPx (U <sup>§</sup> /mg protein) | Heart  | 6.89 ± 0.38  | 6.45 ± 0.33  | 4.18 ± 0.35 <sup>*</sup>   | 5.29 ± 0.28 <sup>#</sup>  |
|                                  | Aorta  | 8.18 ± 0.51  | 8.29 ± 0.45  | 5.12 ± 0.43 <sup>*</sup>   | 7.05 ± 0.38 <sup>#</sup>  |
| GSH (μg/mg protein)              | Heart  | 8.68 ± 0.48  | 8.53 ± 0.42  | 5.12 ± 0.47 <sup>*</sup>   | 7.06 ± 0.39 <sup>#</sup>  |
|                                  | Aorta  | 7.45 ± 0.38  | 7.33 ± 0.27  | 4.56 ± 0.35 <sup>*</sup>   | 6.24 ± 0.39 <sup>#</sup>  |
| TBARS (mmol/100 g wet tissue)    | Heart  | 0.61 ± 0.03  | 0.58 ± 0.02  | 2.57 ± 0.15 <sup>*</sup>   | 0.96 ± 0.04 <sup>#</sup>  |
|                                  | Aorta  | 0.53 ± 0.03  | 0.51 ± 0.02  | 1.81 ± 0.09 <sup>*</sup>   | 0.75 ± 0.03 <sup>#</sup>  |
| LOOH (mmol/100 g wet tissue)     | Heart  | 62.34 ± 4.16 | 60.46 ± 3.79 | 123.44 ± 9.23 <sup>*</sup> | 79.56 ± 4.19 <sup>#</sup> |
|                                  | Aorta  | 74.27 ± 5.11 | 71.29 ± 4.56 | 108.23 ± 8.17 <sup>*</sup> | 84.56 ± 5.22 <sup>#</sup> |

U<sup>\*</sup> = enzyme concentration required to inhibit the chromogen produced by 50% in one minute under standard condition. U<sup>#</sup> = μM of H<sub>2</sub>O<sub>2</sub> consumed/minute. U<sup>§</sup> = μg of GSH utilized/minute. Values are expressed as mean ± SD.

<sup>\*</sup>P<0.05 vs control;

<sup>#</sup>P<0.05 vs L-NAME; n = 6 per group.

doi:10.1371/journal.pone.0115682.t001

superimposable, except for a minimally reduced relaxation in the aortic rings from rats given L-NAME (Fig. 4C).

### Differentially expressed mRNAs and protein

L-NAME rat hearts showed significantly (*P*<0.05) elevated mRNA expression of TGF-β and β-MHC, compared with control when normalized with GAPDH expression. SA treatment significantly (*P*<0.05) suppressed the expression of above mRNAs in L-NAME rat heart (Fig. 5A). eNOS mRNA and protein expressions in L-NAME aorta were significantly (*P*<0.05) decreased compared

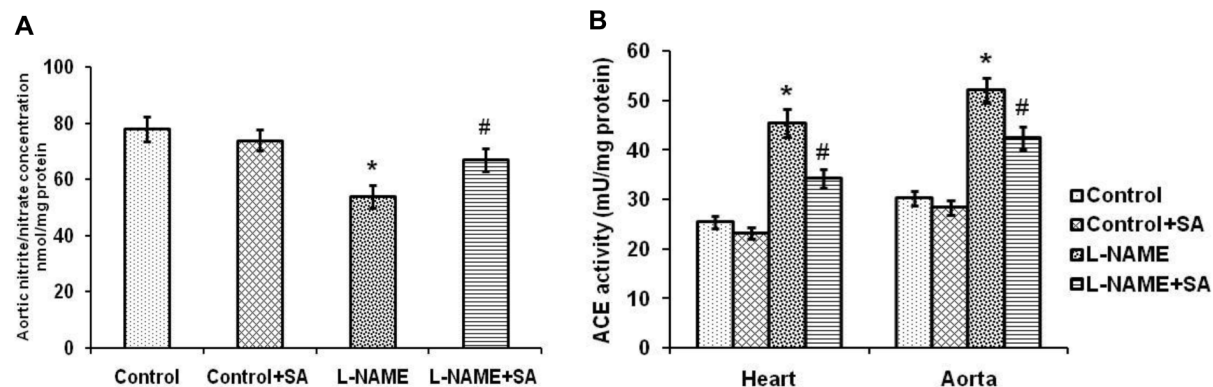

**Fig. 3. Sinapic acid restores nitric oxide metabolites level and ACE activity in experimental hypertensive rats.** (A) Estimation of nitric oxide metabolites level in various experimental groups. (B) Assessment of ACE activity in various experimental groups. Values are expressed as mean ± SD. n=6 per group. <sup>\*</sup> *P*<0.05 vs control; <sup>#</sup> *P*<0.05 vs L-NAME.

doi:10.1371/journal.pone.0115682.g003



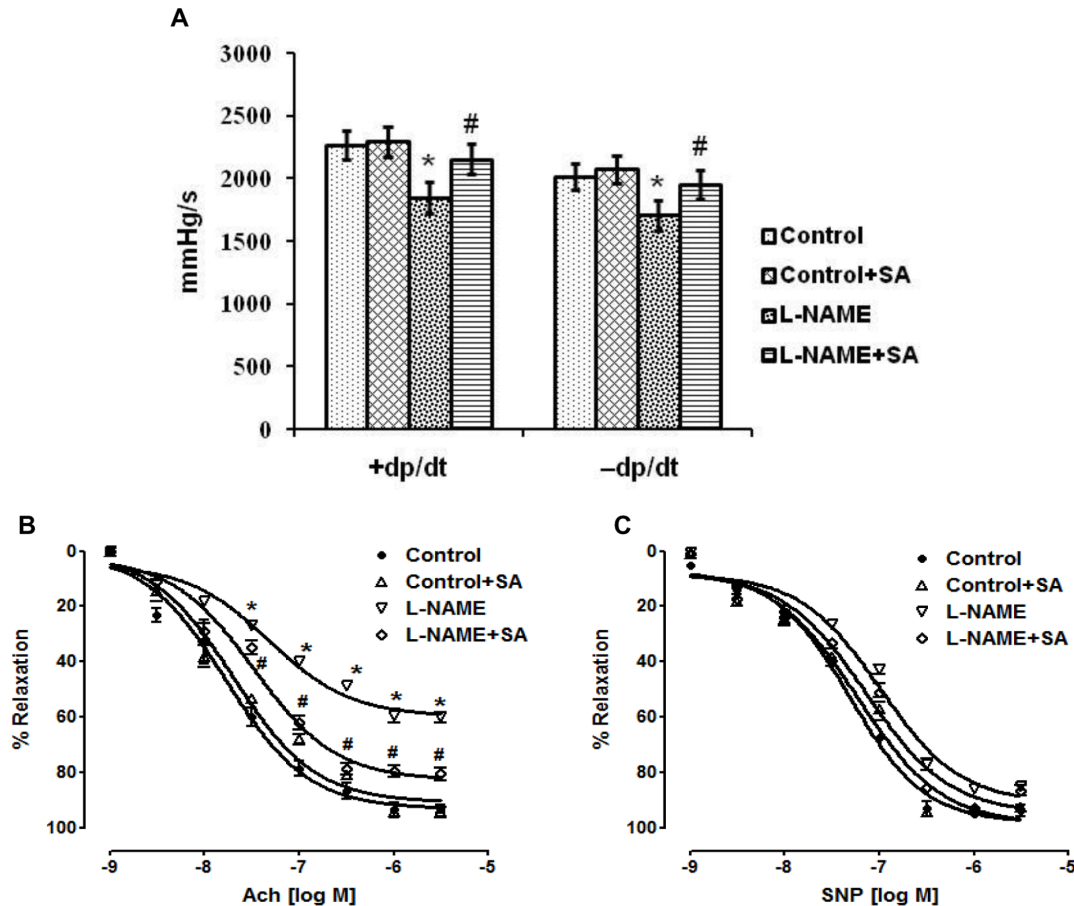

**Fig. 4. Sinapic acid improved cardiovascular function in experimental hypertensive rats.** (A) Evaluation of ventricular function in heart of various experimental groups. (B) Cumulative concentration-response curves of Ach induced relaxation in endothelium-intact aortic rings. (C) Cumulative concentration-response curves of SNP induced relaxation in endothelium-intact aortic rings. Values are expressed as mean  $\pm$  SD. n=6 per group. \*  $P < 0.05$  vs control; #  $P < 0.05$  vs L-NAME.

doi:10.1371/journal.pone.0115682.g004

with control. SA treated aorta showed significantly increased eNOS expression compared with L-NAME (Fig. 5B and C, respectively).

### Oxidative stress and nitric oxide level – *in vitro* study

The results of MTT assay explored that SA does not interfere with the viability of EA.hy926 cells upto 100  $\mu$ M (Fig. 6A). Moreover, the cell viability was increased against  $H_2O_2$ -induced oxidative stress in a concentration dependent manner and among the three doses (0.1, 1 and 10  $\mu$ M) 1 and 10  $\mu$ M of SA have showed significant ( $P < 0.05$ ) effect when compared with  $H_2O_2$  alone treated group (Fig. 6B). 10  $\mu$ M showed significant ( $P < 0.05$ ) effect when compared with 1  $\mu$ M, so we have chosen 10  $\mu$ M dose for evaluation of total ROS and NO level. The elevation of oxidative stress upon  $H_2O_2$  treatment and the amelioration effect of SA was shown by fluorescence analysis, which indicates SA significantly ( $P < 0.05$ ) protects cells from ROS generation (Fig. 7A and C). Further, NO level was also

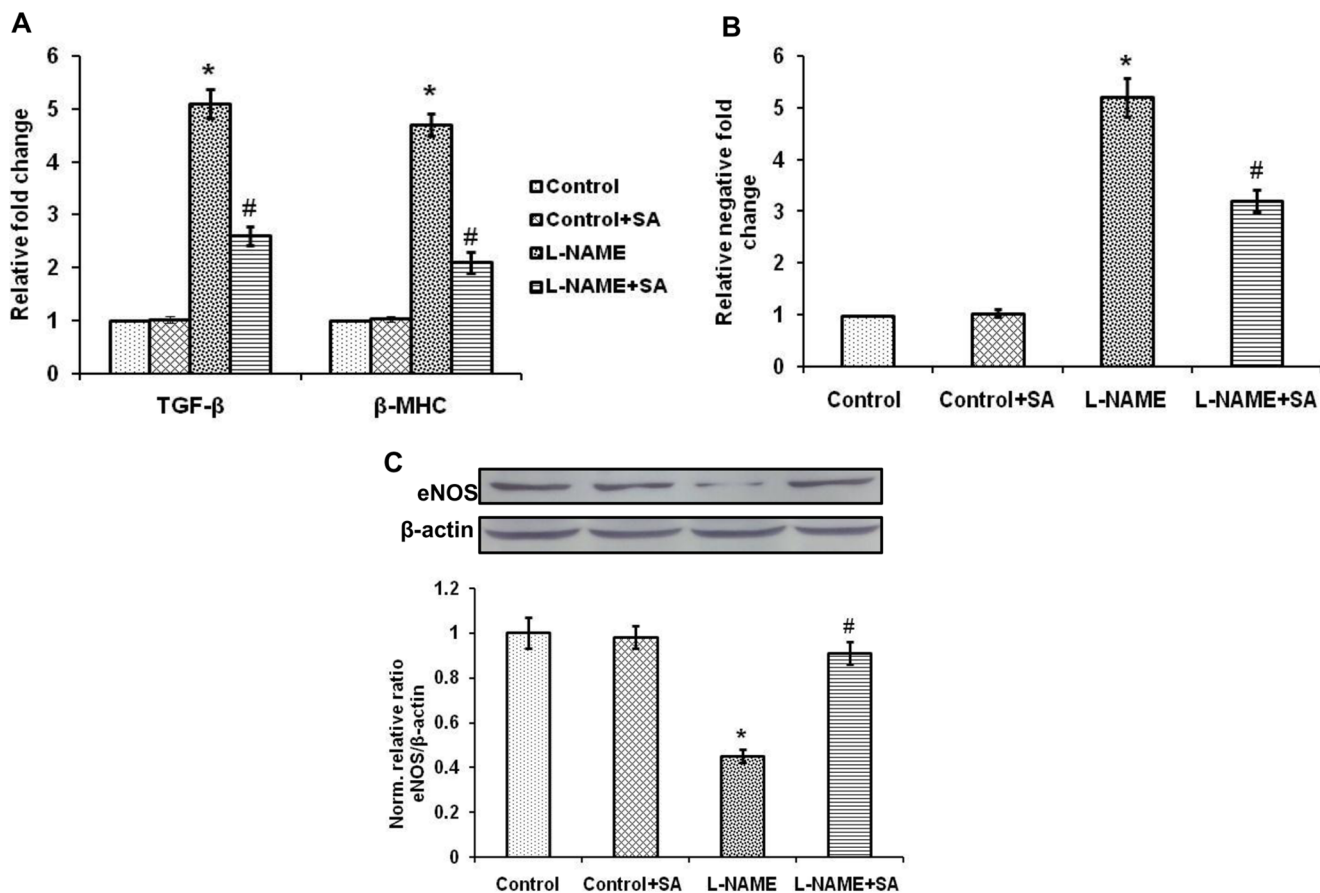

**Fig. 5. Sinapic acid prevents deregulated expression of cardiovascular genes.** (A) Relative expression fold changes of TGF-β and β-MHC mRNAs in heart. (B) Relative expression negative fold change of eNOS mRNA in aorta. (C) Differential eNOS protein expression in aorta and its normalized value with β-actin. Values are expressed as means ± SD. All experiments were done in triplicates. \*  $P < 0.05$  vs control; #  $P < 0.05$  vs L-NAME.

doi:10.1371/journal.pone.0115682.g005

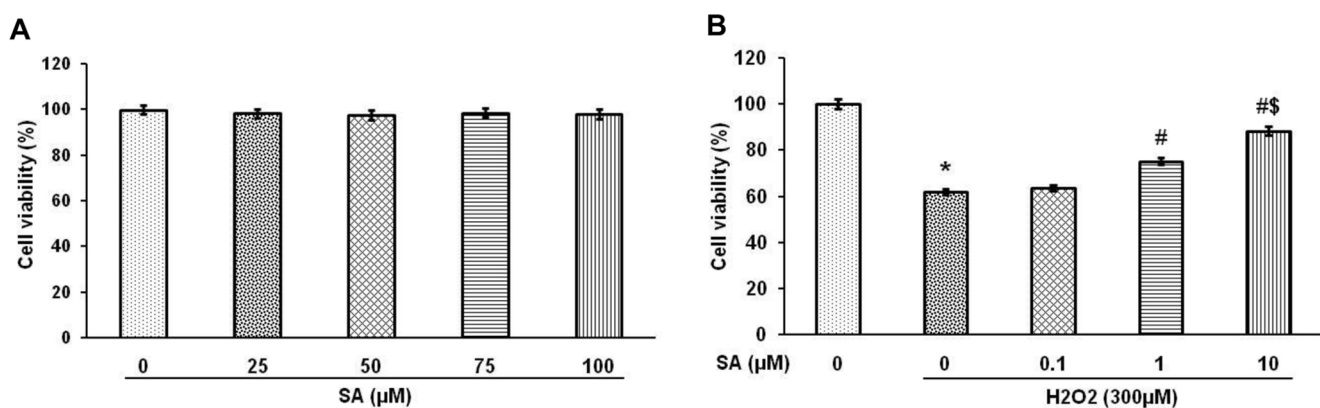

**Fig. 6. Sinapic acid protects EA.hy926 cells from H<sub>2</sub>O<sub>2</sub>-induced cytotoxicity.** (A) The toxic effect of SA (25–100 μM) was measured in Ea.hy926 cells by MTT assay. (B) Different concentrations of SA (0.1–10 μM) were pre-treated for 24 h prior to incubation of cells with 300 μM of H<sub>2</sub>O<sub>2</sub> for 4 h. MTT assay was performed and the values are expressed as mean ± SEM of three independent experiments. \*  $P < 0.05$  vs Control; #  $P < 0.05$  vs H<sub>2</sub>O<sub>2</sub> alone group; \$  $P < 0.05$  vs 1 μM.

doi:10.1371/journal.pone.0115682.g006

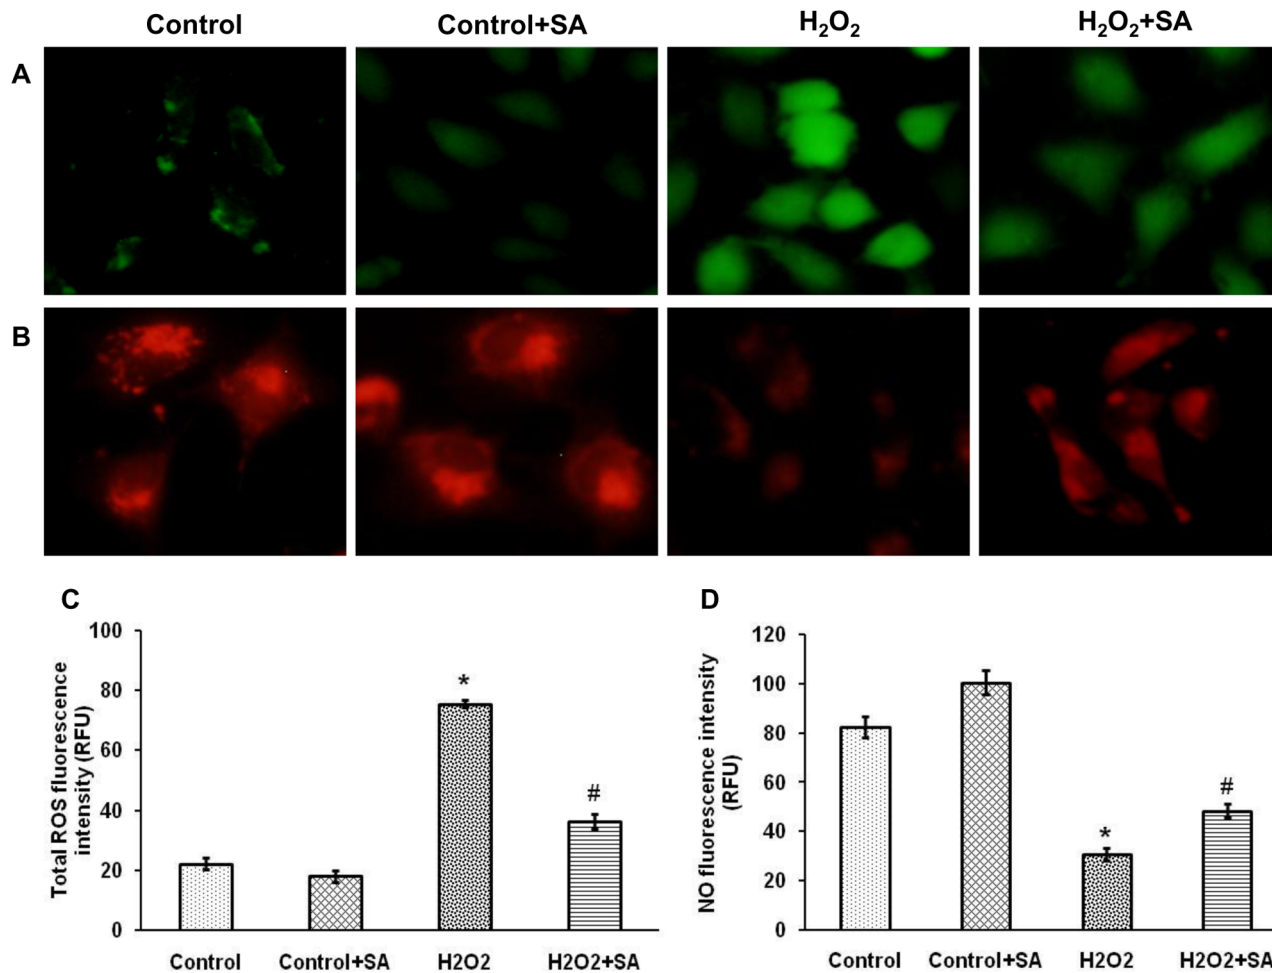

**Fig.7. Sinapic acid decreases total ROS and improves NO level in EA.hy926 cells.** 10  $\mu$ M SA was pre-treated for 24 h prior to incubation of cells with 300  $\mu$ M of H<sub>2</sub>O<sub>2</sub> for 4 h. (A) Intracellular total ROS level was measured by the fluorescent probe DCFH-DA and the images were obtained by fluorescence microscopy. (B) NO level was measured by the fluorescent probe DAR-4M AM and the images were obtained by fluorescence microscopy. The representative images from three independent experiments are shown. (C) Total ROS fluorescence intensity value was calculated using Adobe Photoshop version 7.0. (D) Fluorescence intensity measurement against NO was calculated using Adobe Photoshop version 7.0. RFU: Relative Fluorescence Unit. Values are expressed as mean  $\pm$  SEM. \*  $P < 0.05$  vs control; #  $P < 0.05$  vs H<sub>2</sub>O<sub>2</sub>.

doi:10.1371/journal.pone.0115682.g007

significantly ( $P < 0.05$ ) elevated in H<sub>2</sub>O<sub>2</sub>-induced cells upon SA treatment (Fig. 7B and D).

## Discussion

Oxidative stress via production of reactive oxygen species (ROS) plays an important role in the development of hypertension [37]. Endogenous nitric oxide (NO) regulates myocardial remodeling [38]. Chronic inhibition of NO produces volume-dependent elevation of blood pressure; and its physiological and pathological characteristics resemble essential hypertension. Besides, it is well established that acute inhibition of NO biosynthesis by *in vivo* administration of



L-NAME, an L-arginine analog, leads to arterial hypertension and vasoconstriction [21]. In this study, L-NAME rats showed significantly increased systolic blood pressure and this increase was attenuated by sinapic acid (SA) treatment.

Free radical-scavenging enzymes such as SOD, CAT, and GPx are the first line of cellular defense against oxidative injury, decomposing superoxide and hydrogen peroxide, otherwise interacting to form the more reactive hydroxyl radical [39]. The equilibrium between the enzymatic antioxidants and free radicals is an important process for the effective removal of oxidative stress in intracellular organelles [40]. In this study, significantly lowered activities of the enzymes SOD, CAT and GPx were observed in heart and aorta of L-NAME rats. The decrease in the activities of SOD and CAT might be due to their increased utilization in scavenging ROS and their inactivation by excessive oxidants. GPx offers protection to the cellular and subcellular membranes from peroxidative damage by eliminating hydrogen peroxide and lipid peroxides and its declined activity may be due to the reduced availability of GSH [41]. Previous reports explored that oxidative stress derived from NADPH oxidase has been implicated in the physiopathogenesis of hypertensive LV remodeling [42, 43].

Lipid peroxidation, arising from the reaction of free radicals with lipids, has been linked with altered membrane structure and enzyme inactivation. Its end products measured as thiobarbituric acid reactive substances and lipid hydroperoxides were seen to be highly increased in heart and aortic tissues clearly indicating increased oxidative stress in L-NAME rats, which has been discussed above. SA attenuates oxidative stress by enhancing antioxidants and prevents membrane damage through its antioxidant efficiency was already reported [44]. Moreover, *in vitro* free radical scavenging effect of SA through its antioxidant potential was also already discovered [17, 18]. From these evidences, we come to a decision that the protective action of SA would be at least partially due to its antioxidant potential.

Cardiac hypertrophy correlates with increased blood pressure, increased fibrosis, collagen deposition, and reduced cardiac function. Hydroxyproline is a component of collagen and a quantitative index of fibrosis. Collagen accumulation occurs in the heart during heart failure and contributes to stiffening of the heart walls, impaired relaxation, impaired filling, and reduced cardiac output [45]. In this study, the elevated cardiac weight in hypertension was significantly suppressed by SA treatment, this may be due to the antihypertensive potential of SA which in turn reduces pressure load induced hypertrophy.

In the present study, sinapic acid with antioxidant function blunts L-NAME induced cardiovascular fibrosis as indicated by hydroxyproline level and histopathological analysis. A previous study indicated that oxidative stress generated during hypertensive condition has the potential to induce fibrosis [46]. Another study suggests that ROS production would contribute to the perivascular inflammation and subsequent myocardial fibrosis through angiotensin II (Ang II) [47]. In the current study, elevated ACE activity in hypertensive heart may enhance the conversion of angiotensin I (Ang I) into bioactive angiotensin II (Ang II) which clearly mirrors the part of Ang II in myocardial fibrosis. Moreover,

cardiac oxidative stress promotes the development of cardiac fibrosis by upregulating TGF- $\beta$  expression, which subsequently enhances cardiac collagen synthesis and suppresses collagen degradation in hypertensive rats [48].

In the current study, upregulated expression of TGF- $\beta$  and  $\beta$ -MHC were observed in hypertensive condition. At the molecular level, pathological stresses induce multiple changes, including genetic reprogramming [49]. The upregulated gene TGF- $\beta$  is a locally generated cytokine that has been implicated as a major contributor to tissue fibrosis and latest studies in humans and experimental models have shown increased myocardial TGF- $\beta$  expression during cardiac hypertrophy and fibrosis [50, 51]. Upregulation of  $\beta$ -MHC transcription has been used as an early and sensitive marker of cardiac hypertrophy. In general,  $\alpha$ -MHC is normally a predominant isoform occurring in heart and expression of  $\beta$ -MHC contributes to the overall poor functioning of the hypertrophic ventricle [52]. Recent studies provide evidence that the antioxidant apocynin attenuates oxidative stress and cardiac fibrosis in angiotensin II-induced cardiac diastolic dysfunction in mice [53]. Consistent with the prior study [44], this study also found SA with antioxidant function enhances the antioxidant network thereby it decreases the oxidative stress and fibrosis.

Cardiac contractile function impairment is one of the major pathogenic features of cardiac remodeling. The isolated heart Langendorff study explains that the hypertension induces ventricular dysfunction. It was previously known that, excess production and accumulation of extracellular matrix structural proteins, or fibrosis, results in enhanced stiffness of the myocardium and impedes ventricular contraction and relaxation, leading to distorted architecture and function of the heart. Excess collagen deposition and fibrosis has been clearly linked to myocardial stiffness, diastolic and systolic dysfunction [54, 55]. In the antioxidant point of view, Mapanga et al. explored that oleanolic acid, an antioxidant agent that blunts hyperglycemia-induced contractile dysfunction [56]. In consistent with the previous report, in this study L-NAME induction reduces the contractile function and SA treatment restores the ventricular function with its antioxidant property.

The protection of vascular function by SA was one of the significant findings of this study. Vascular endothelium plays a pivotal role in the pathophysiology of cardiovascular system. Nitric oxide (NO), generated by eNOS, is physiologically important in vascular homeostasis, which readily activates guanylyl cyclase and increases cyclic GMP formation in vascular smooth muscle [57]. Endogenous NO reacts with superoxide to form peroxynitrite (ONOO<sup>-</sup>), which is capable of either oxidizing or nitrating various biological substrates [58]. Previous study illustrates that, pioglitazone administration reduced oxidative stress, prevented breakdown of NO and increased NO levels, thereby restoring the endothelial function in aorta of diabetic rat [30]. In the current study, decreased response of aorta to Ach induced endothelium dependent relaxations occurred in L-NAME induced hypertensive rats might be due to the reduced production/bioavailability of NO and elevated oxidative stress. Moreover, in the present study eNOS mRNA and protein expressions were down regulated coupled with increased ACE activity in

the aorta of L-NAME rats whereas SA restored the above. In a similar study, L-NAME treated rats showed definite increase in systolic blood pressure, decrease in eNOS gene expression in aortic tissue and decreased response of aorta to acetylcholine. Further, ACE inhibition by enalapril or quinapril was equally effective in improving endothelial vasodilator function and restoring aortic eNOS mRNA [59]. Likewise, protective action of SA might be due to increased NO level and decreased ACE activity through antioxidant potential, which was strongly supported by our *in vitro* endothelial cell culture study.

In order to support our *in vivo* results obtained from isolated aortic ring experiments in organ bath system, we analyzed the protective effect of SA on endothelial cell injury induced by H<sub>2</sub>O<sub>2</sub> *in vitro*. In this study, we demonstrated that H<sub>2</sub>O<sub>2</sub> could markedly increase cell death, induce oxidative stress and decline NO production. The up-regulation of ROS in vascular lesions will exert detrimental effects on the peroxidation of membrane lipids, endothelium-derived enzyme inactivation, apoptotic occurrences, etc [60]. In contrast, antioxidants/agents that react preferentially with ROS to inactivate them or enhance cellular antioxidant defenses can protect cells from the damaging effects of oxygen radicals [61]. Observations of a former study on the current model have provide preliminary evidence that antioxidant TSN IIA protects EA.hy926 cells against H<sub>2</sub>O<sub>2</sub> damage, which is mainly associated with the ROS generation [35]. Similarly, our study showed that SA not only reduced the intracellular ROS induced by H<sub>2</sub>O<sub>2</sub>, but also effectively increase cell viability and NO level in H<sub>2</sub>O<sub>2</sub>-induced endothelial cells, which shows the protective potential of SA on endothelial cells.

In conclusion, hypertensive rats treated with SA demonstrated attenuated hypertension and improved cardiovascular function. SA treatment reduced the oxidative stress and myocardial fibrosis observed in hypertensive rats. These findings suggest that SA may have great therapeutic potential in the treatment of hypertensive heart disease.

## Acknowledgments

The authors wish to thank Dr. S. K. Mishra for organ bath facility provided (Division of Pharmacology and Toxicology, Indian Veterinary Research Institute, India).

## Author Contributions

Conceived and designed the experiments: TS JM BR SC. Performed the experiments: TS JM MK NS. Analyzed the data: TS JM MK NS. Contributed reagents/materials/analysis tools: BR SC. Wrote the paper: TS JM.

## References

1. Lawes CM, Vander Hoorn S, Rodgers A (2008) Global burden of blood-pressure-related disease, 2001. *Lancet* 371: 1513–1518.

2. **Zhang Y, Shao L, Ma A, Guan G, Wang J, et al.** (2014) Telmisartan delays myocardial fibrosis in rats with hypertensive left ventricular hypertrophy by TGF- $\beta$ 1/Smad signal pathway. *Hypertens Res* 37: 43–49.
3. **Cohn JN, Ferrari R, Sharpe N** (2000) Cardiac remodeling—concepts and clinical implications: a consensus paper from an international forum on cardiac remodeling. Behalf of an International Forum on Cardiac Remodeling. *J Am Coll Cardiol* 35: 569–582.
4. **Galderisi M, de Divitiis O** (2008) Risk Factor-induced Cardiovascular Remodeling and the Effects of Angiotensin-Converting Enzyme Inhibitors. *J Cardiovasc Pharmacol* 51: 523–531.
5. **Kehat I, Molkentin JD** (2010) Molecular Pathways Underlying Cardiac Remodeling During Pathophysiological Stimulation. *Circulation* 122: 2727–2735.
6. **Cataliotti A, Tonne JM, Bellavia D, Martin FL, Oehler EA, et al.** (2011) Longterm cardiac pro-B-type natriuretic peptide gene delivery prevents the development of hypertensive heart disease in spontaneously hypertensive rats. *Circulation* 123: 1297–1305.
7. **Becker LB** (2004) New concepts in reactive oxygen species and cardiovascular reperfusion physiology. *Cardiovasc Res* 61: 461–470.
8. **Juránek I, Bezek S** (2005) Controversy of free radical hypothesis: reactive oxygen species—cause or consequence of tissue injury? *Gen Physiol Biophys* 24: 263–278.
9. **Sabri A, Hughie HH, Lucchesi PA** (2003) Regulation of hypertrophic and apoptotic signaling pathways by reactive oxygen species in cardiac myocytes. *Antioxid Redox Signal* 5: 731–740.
10. **Taniyama Y, Griending KK** (2003) Reactive oxygen species in the vasculature: molecular and cellular mechanisms. *Hypertension* 42: 1075–1081.
11. **Paravicini TM, Touyz RM** (2008) NADPH oxidases, reactive oxygen species, and hypertension: clinical implications and therapeutic possibilities. *Diabetes Care* 31 Suppl 2: S170–S180.
12. **Matsushita K, Morrell CN, Cambien B, Yang SX, Yamakuchi M, et al.** (2003) Nitric oxide regulates exocytosis by S-nitrosylation of N-ethylmaleimide-sensitive factor. *Cell* 115: 139–150.
13. **Morrell CN, Matsushita K, Chiles K, Scharpf RB, Yamakuchi M, et al.** (2005) Regulation of platelet granule exocytosis by S-nitrosylation. *Proc Natl Acad Sci U S A* 102: 3782–3787.
14. **Attia DM, Verhagen AM, Stroes ES, van Faassen EE, Gröne HJ, et al.** (2001) Vitamin E alleviates renal injury, but not hypertension, during chronic nitric oxide synthase inhibition in rats. *J Am Soc Nephrol* 12: 2585–2593.
15. **Kumar S, Saravanakumar M, Raja B** (2010) Efficacy of piperine, an alkaloidal constituent of pepper on nitric oxide, antioxidants and lipid peroxidation markers in L-NAME induced hypertensive rats. *Int J Res Pharm Sci* 1: 300–307.
16. **Andreasen MF, Landbo AK, Christensen LP, Hansen A, Meyer AS** (2001) Antioxidant effects of phenolic rye (*Secale cereale* L.) extracts, monomeric hydroxycinnamates and ferulic acid dehydrodimers on human low-density lipoproteins. *J Agric Food Chem* 49: 4090–4096.
17. **Roy SJ, Prince PSM** (2012) Protective effects of sinapic acid on lysosomal dysfunction in isoproterenol induced myocardial infarcted rats. *Food Chem Toxicol* 50: 3984–3989.
18. **Roy SJ, Prince PSM** (2013) Protective effects of sinapic acid on cardiac hypertrophy, dyslipidaemia and altered electrocardiogram in isoproterenol-induced myocardial infarcted rats. *Eur J Pharmacol* 699: 213–218.
19. **Kanchana G, Shyni WJ, Rajadurai M, Periasamy R** (2011) Evaluation of Antihyperglycemic Effect of Sinapic Acid in Normal and Streptozotocin-Induced Diabetes in Albino Rats. *Global Journal of Pharmacology* 5: 33–39.
20. **Zou Y, Kim AR, Kim JE, Choi JS, Chung HY** (2002) Peroxynitrite scavenging activity of sinapic acid (3,5-dimethoxy-4-hydroxycinnamic acid) isolated from *Brassica juncea*. *J Agric Food Chem* 50: 5884–5890.
21. **Saravanakumar M, Raja B** (2011) Veratric acid, a phenolic acid attenuates blood pressure and oxidative stress in L-NAME induced hypertensive rats. *Eur J Pharmacol* 671: 87–94.
22. **Susic D, Varagic J, Ahn J, Matavelli L, Frohlich ED** (2007) Long-term mineralocorticoid receptor blockade reduces fibrosis and improves cardiac performance and coronary hemodynamics in elderly SHR. *Am J Physiol Heart Circ Physiol* 292: H175–H179.

23. **Kakkar P, Das B, Viswanathan PN** (1984) A modified spectrophotometric assay of superoxide dismutase. *Indian J Biochem Biophys* 21: 130–132.
24. **Sinha AK** (1972) Colorimetric assay of catalase. *Anal Biochem* 47: 389–394.
25. **Rotruck JT, Pope AL, Ganther HE, Swanson AB, Hafeman DG, et al.** (1973) Selenium: biochemical role as a component of glutathione peroxidase. *Science* 179: 588–590.
26. **Ellman GL** (1959) Tissue sulfhydryl groups. *Arch Biochem Biophys* 82: 70–77.
27. **Lowry OH, Rosebrough NJ, Farr AL, Randall AL** (1951) Protein measurement with the Folin phenol reagent. *J Biol Chem* 193: 265–275.
28. **Niehaus WG, Samuelsson B** (1968) Formation of malondialdehyde from phospholipid arachidonate during microsomal lipid peroxidation. *Eur J Biochem* 6: 126–130.
29. **Jiang ZY, Hunt JV, Wolff SP** (1992) Ferrous ion oxidation in the presence of xylenol orange for detection of lipid hydroperoxide in low density lipoprotein. *Anal Biochem* 202: 384–389.
30. **Majithiya JB, Paramar AN, Balaraman R** (2005) Pioglitazone, a PPAR  $\gamma$  agonist, restores endothelial function in aorta of streptozotocin-induced diabetic rats. *Cardiovasc Res* 66: 150–161.
31. **Sharma DK, Manral A, Saini V, Singh A, Srinivasan BP, et al.** (2012) Novel diallyldisulfide analogs ameliorate cardiovascular remodeling in rats with L-NAME-induced hypertension. *Eur J Pharmacol* 691: 198–208.
32. **Fenning A, Harrison G, Rose'meyer R, Hoey A, Brown L** (2005) L-arginine attenuates cardiovascular impairment in DOCA-salt hypertensive rats. *Am J Physiol Heart Circ Physiol* 289: H1408–H1416.
33. **Sukumaran SV, Singh TU, Parida S, Narasimha Reddy ChE, Thangamalai R, et al.** (2013) TRPV4 channel activation leads to endothelium-dependent relaxation mediated by nitric oxide and endothelium-derived hyperpolarizing factor in rat pulmonary artery. *Pharmacol Res* 78: 18–27.
34. **Schmittgen TD, Livak KJ** (2008) Analyzing real-time PCR data by the comparative CT method. *Nat Protoc* 3: 1101–1108.
35. **Jia LQ, Yang GL, Ren L, Chen WN, Feng JY, et al.** (2012) Tanshinone IIA reduces apoptosis induced by hydrogen peroxide in the human endothelium-derived EA.hy926 cells. *J Ethnopharmacol* 143: 100–108.
36. **Siamwala JH, Dias PM, Majumder S, Joshi MK, Sinkar VP, et al.** (2013) L-theanine promotes nitric oxide production in endothelial cells through eNOS phosphorylation. *J Nutr Biochem* 24: 595–605.
37. **Dikalov SI, Ungvari Z** (2013) Role of mitochondrial oxidative stress in hypertension. *Am J Physiol Heart Circ Physiol* 305: H1417–H1427.
38. **Kazakov A, Hall R, Jagoda P, Bachelier K, Müller-Best P, et al.** (2013) Inhibition of endothelial nitric oxide synthase induces and enhances myocardial fibrosis. *Cardiovasc Res* 100: 211–221.
39. **Rodrigo R, Libuy M, Feliú F, Hasson D** (2013) Oxidative stress-related biomarkers in essential hypertension and ischemia-reperfusion myocardial damage. *Dis Markers* 35: 773–790.
40. **Senthil S, Veerappan RM, Ramakrishna Rao M, Pugalendi KV** (2004) Oxidative stress and antioxidants in patients with cardiogenic shock complicating acute myocardial infarction. *Clin Chim Acta* 348: 131–137.
41. **Li H, Xie YH, Yang Q, Wang SW, Zhang BL, et al.** (2012) Cardioprotective effect of paeonol and danshensu combination on isoproterenol-induced myocardial injury in rats. *PLoS ONE* 7: e48872.
42. **Maytin M, Siwik DA, Ito M, Xiao L, Sawyer DB, et al.** (2004) Pressure overload-induced myocardial hypertrophy in mice does not require gp91phox. *Circulation* 109: 1168–1171.
43. **Murdoch CE, Zhang M, Cave AC, Shah AM** (2006) NADPH oxidase-dependent redox signalling in cardiac hypertrophy, remodelling and failure. *Cardiovasc Res* 71: 208–215.
44. **Pari L, Jalaludeen AM** (2011) Protective role of sinapic acid against arsenic – Induced toxicity in rats. *Chem Biol Interact* 194: 40–47.
45. **Seymour EM, Singer AM, Bennink MR, Parikh RV, Kirakosyan A, et al.** (2008) chronic intake of a phytochemical-enriched diet reduces cardiac fibrosis and diastolic dysfunction caused by prolonged salt-sensitive hypertension. *J Gerontol A Biol Sci Med Sci* 63: 1034–1042.

46. Hiremath P, Bauer M, Aguirre AD, Cheng HW, Unno K, et al. (2014) Identifying early changes in myocardial microstructure in hypertensive heart disease. *PLoS One* 9: e97424.
47. Kai H, Mori T, Tokuda K, Takayama N, Tahara N, et al. (2006) Pressure overload-induced transient oxidative stress mediates perivascular inflammation and cardiac fibrosis through angiotensin II. *Hypertens Res* 29: 711–718.
48. Zhao W, Zhao T, Chen Y, Ahokas RA, Sun Y (2008) Oxidative stress mediates cardiac fibrosis by enhancing transforming growth factor-beta1 in hypertensive rats. *Mol Cell Biochem* 317: 43–50.
49. Pandya K, Smithies O (2011)  $\beta$ -MyHC and Cardiac Hypertrophy: size does matter. *Circ Res* 109: 609–610.
50. Rosenkranz S (2004) TGF- $\beta$ 1 and angiotensin networking in cardiac remodeling. *Cardiovasc Res* 63: 423–432.
51. Boluyt MO, O'Neill L, Meredith AL, Bing OH, Brooks WW, et al. (1994) Alterations in cardiac gene expression during the transition from stable hypertrophy to heart failure: Marked upregulation of genes encoding extracellular matrix components. *Circ Res* 75: 23–32.
52. Krenz M, Robbins J (2004) Impact of beta-myosin heavy chain expression on cardiac function during stress. *J Am Coll Cardiol* 44: 2390–2397.
53. Li YQ, Li XB, Guo SJ, Chu SL, Gao PJ, et al. (2013) Apocynin attenuates oxidative stress and cardiac fibrosis in angiotensin II-induced cardiac diastolic dysfunction in mice. *Acta Pharmacol Sin* 34: 352–359.
54. Diez J, Querejeta R, Lopez B, Gonzalez A, Larman M, et al. (2002) Losartan-dependent regression of myocardial fibrosis is associated with reduction of left ventricular chamber stiffness in hypertensive patients. *Circulation* 105: 2512–2517.
55. Manabe I, Shindo T, Nagai R (2002) Gene expression in fibroblasts and fibrosis: involvement in cardiac hypertrophy. *Circ Res* 91: 1103–1113.
56. Mapanga RF, Rajamani U, Dlamini N, Zungu-Edmondson M, Kelly-Laubscher R, et al. (2012) Oleanolic acid: a novel cardioprotective agent that blunts hyperglycemia-induced contractile dysfunction. *PLoS One* 7: e47322.
57. Tawfik HE, Cena J, Schulz R, Kaufman S (2008) Role of oxidative stress in multiparity-induced endothelial dysfunction. *Am J Physiol Heart Circ Physiol* 295: H1736–H1742.
58. Zobali F, Cakici I, Karasu C (2001) Effects of peroxynitrite on the reactivity of diabetic rat aorta. *Pharmacology* 63: 58–64.
59. De Gennaro Colonna V, Rossoni G, Rigamonti A, Bonomo S, Manfredi B, et al. (2002) Enalapril and quinapril improve endothelial vasodilator function and aortic eNOS gene expression in L-NAME-treated rats. *Eur J Pharmacol* 450: 61–66.
60. Xu HB, Huang ZQ (2007) Icarin enhances endothelial nitric-oxide synthase expression on human endothelial cells in vitro. *Vascul Pharmacol* 47: 18–24.
61. Fang WT, Li HJ, Zhou LS (2010) Protective effects of prostaglandin E1 on human umbilical vein endothelial cell injury induced by hydrogen peroxide. *Acta Pharmacol Sin* 31: 485–492.
